# Supplementary material
Source: PubMed Central journal article supplement (PMC515104)

a)

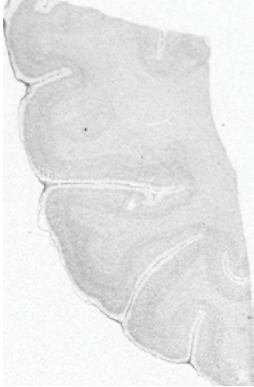

b)

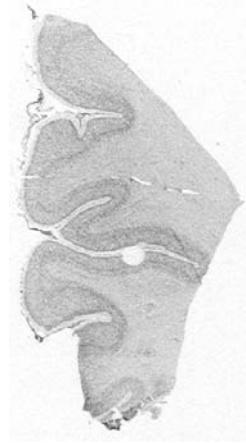

c)

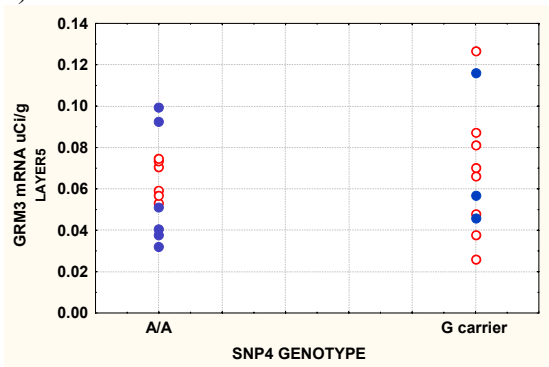

Supplement: pnas_101_34_12604__3.pdf [file pnas_101_34_12604__3.pdf]

A)

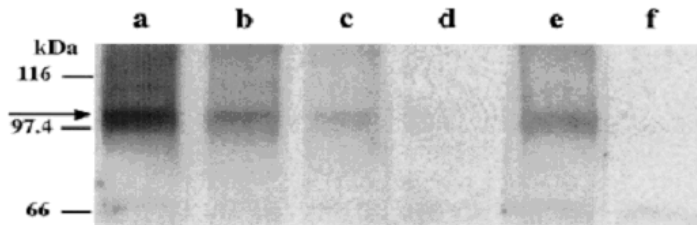

B)

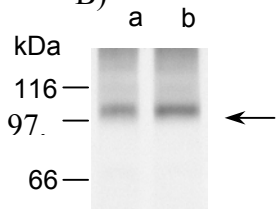

Subject a = A/A genotype  
Subject b = A/G genotype  
Arrow = ~100kDa = GRM3 band

C)

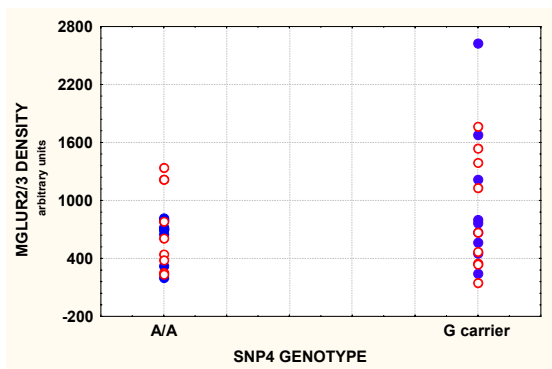

Supplement: pnas_101_34_12604__4.pdf [file pnas_101_34_12604__4.pdf]

a)

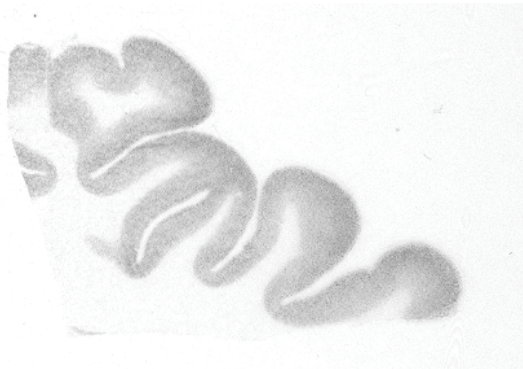

b)

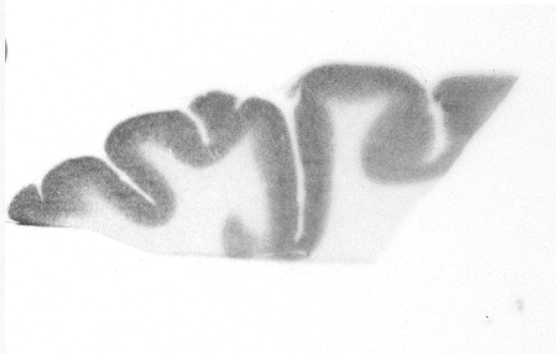

Supplement: pnas_101_34_12604__6.pdf [file pnas_101_34_12604__6.pdf]
